# Supplementary material for: Crystal chemistry and physical properties of the A2M3(H2O)2[B4P6O24(OH)2] (A = Cs, Rb; M = Ni, Cu, (Ni, Fe)) borophosphate family
Source: Royal Society of Chemistry journal article supplement (doi:10.1039/c9dt00564a), 2019-01-01
Supplement: c9dt00564a4.pdf [file c9dt00564a4.pdf]

## Supplementary information

### Crystal chemistry and physical properties of the $A_2M_3(H_2O)_2[B_4P_6O_{24}(OH)_2]$ ( $A = Cs, Rb; M = Ni, Cu, (Ni, Fe)$ ) borophosphate family

Shvanskaya Larisa, <sup>\*a,b</sup> Yakubovich Olga, <sup>a</sup> Melchakova Lyubov, <sup>a</sup> Ivanova Anna<sup>c</sup> and Vasiliev Alexander <sup>a,b,d</sup>

<sup>a</sup>*M.V. Lomonosov Moscow State University, Leninskie Gory, GSP-1, Moscow, 119991, Russian Federation.*

<sup>b</sup>*National University of Science and Tehnology "MISiS", Leninskiy prospekt, 4, Moscow, 119049, Russian Federation.*

<sup>c</sup>*Shubnikov Institute of Crystallography, RAS, Moscow, Russia.*

<sup>d</sup>*National Research South Ural State University, Chelyabinsk 454080, Russia*

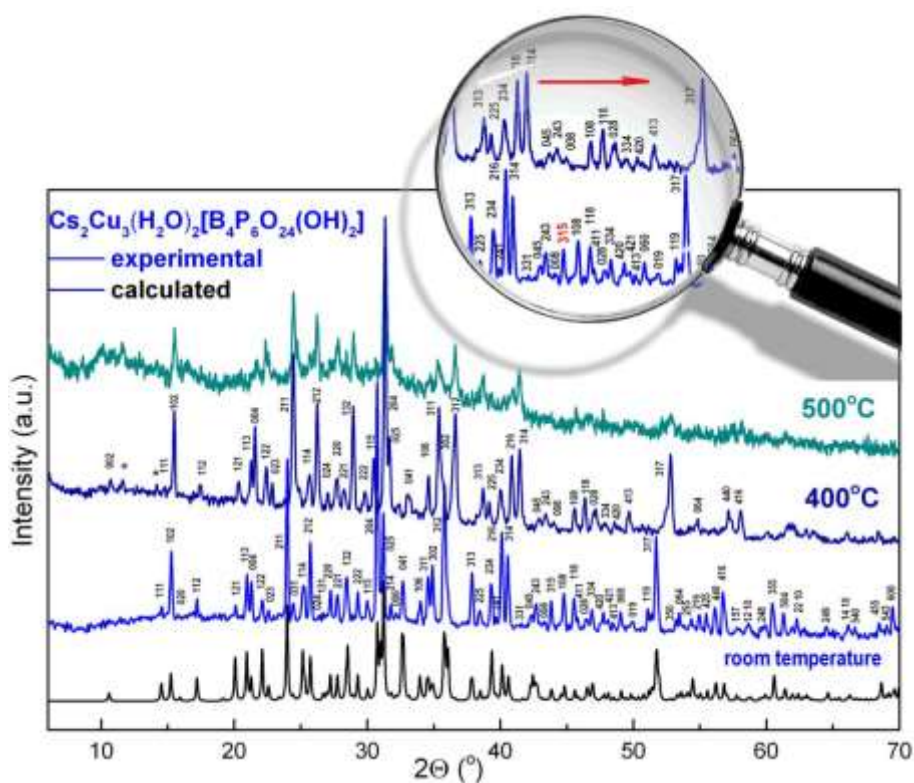

a



Table S1. Atomic coordinates and isotropic/equivalent isotropic displacement parameters ( $\text{\AA}^2$ ) for (I)

| Atom | Wyck. | x/a         | y/b         | z/c         | Uiso/Ueq    |
|------|-------|-------------|-------------|-------------|-------------|
| Cs1  | 8c    | 0.35065(15) | 0.08072(11) | 0.14780(6)  | 0.0311(2)   |
| Cs2  | 8c    | 0.3057(4)   | 0.0979(3)   | 0.1543(2)   | 0.0311(2)   |
| Cs3  | 8c    | 0.3332(7)   | 0.0984(4)   | 0.1346(2)   | 0.0311(2)   |
| Cu1  | 8c    | 0.68366(5)  | 0.29940(4)  | 0.08147(2)  | 0.00971(12) |
| Cu2  | 4a    | ½           | 0           | ½           | 0.01583(18) |
| P1   | 8c    | 0.50040(11) | 0.33388(7)  | 0.21308(4)  | 0.0071(2)   |
| P2   | 8c    | 0.27266(12) | 0.05700(8)  | 0.37681(5)  | 0.0094(2)   |
| P3   | 8c    | 0.50538(11) | 0.27467(8)  | 0.45452(5)  | 0.0114(2)   |
| O1   | 8c    | 0.5071(3)   | 0.3059(2)   | 0.13805(12) | 0.0097(6)   |
| O2   | 8c    | 0.5721(3)   | 0.1888(2)   | 0.49617(13) | 0.0127(6)   |
| O3   | 8c    | 0.4895(3)   | 0.23551(19) | 0.25747(12) | 0.0085(5)   |
| O4   | 8c    | 0.2963(3)   | 0.2997(2)   | 0.32923(12) | 0.0101(6)   |
| O5   | 8c    | 0.3646(3)   | 0.3968(2)   | 0.22630(12) | 0.0101(6)   |
| O6   | 8c    | 0.6274(3)   | 0.4003(2)   | 0.23542(12) | 0.0102(6)   |
| O7   | 8c    | 0.5255(3)   | 0.2511(2)   | 0.37682(13) | 0.0172(7)   |
| O8   | 8c    | 0.3519(3)   | 0.2913(2)   | 0.47306(13) | 0.0197(7)   |
| O9   | 8c    | 0.1871(3)   | -0.0147(2)  | 0.32821(13) | 0.0141(6)   |
| O10  | 8c    | 0.1653(3)   | 0.1249(2)   | 0.41182(13) | 0.0155(6)   |
| O11  | 8c    | 0.3605(3)   | -0.0083(2)  | 0.42494(13) | 0.0177(7)   |
| O12  | 8c    | 0.3700(3)   | 0.1215(2)   | 0.32937(15) | 0.0206(7)   |
| O13  | 8c    | 0.5907(3)   | 0.3772(2)   | 0.46520(14) | 0.0200(7)   |
| O14  | 8c    | 0.3606(3)   | 0.0552(2)   | 0.56421(14) | 0.0190(7)   |
| B1   | 8c    | 0.4158(5)   | 0.2289(3)   | 0.3252(2)   | 0.0092(9)   |
| B2   | 8c    | 0.2767(5)   | 0.3931(3)   | 0.2887(2)   | 0.0083(9)   |
| H1   | 8c    | 0.282(5)    | 0.077(6)    | 0.541(4)    | 0.10(2)     |
| H2   | 8c    | 0.416(7)    | 0.096(5)    | 0.592(3)    | 0.10(2)     |
| H3   | 8c    | 0.611(6)    | 0.378(4)    | 0.5115(8)   | 0.051(17)   |

Site occupations: Cs1 0.673(9), Cs2 0.155(7), 0.172(9).

Table S2. Atomic coordinates and isotropic/equivalent isotropic displacement parameters ( $\text{\AA}^2$ ) for (II)

| Atom | Wyck. | x/a         | y/b         | z/c         | Uiso/Ueq    |
|------|-------|-------------|-------------|-------------|-------------|
| Cs1  | 8c    | 0.3498(3)   | 0.0896(2)   | 0.14664(11) | 0.0297(4)   |
| Cs2  | 8c    | 0.3042(4)   | 0.1071(4)   | 0.1583(3)   | 0.0297(4)   |
| Cs3  | 8c    | 0.3347(13)  | 0.1047(10)  | 0.1352(5)   | 0.0297(4)   |
| Ni1  | 8c    | 0.68817(8)  | 0.31233(6)  | 0.08157(4)  | 0.00351(19) |
| Ni2  | 4a    | ½           | 0           | ½           | 0.0090(3)   |
| P1   | 8c    | 0.51497(16) | 0.34053(13) | 0.21681(8)  | 0.0029(3)   |
| P2   | 8c    | 0.27410(17) | 0.06351(13) | 0.37742(8)  | 0.0036(3)   |
| P3   | 8c    | 0.51049(17) | 0.27543(14) | 0.45528(9)  | 0.0070(4)   |
| O5   | 8c    | 0.3832(4)   | 0.4094(3)   | 0.2305(2)   | 0.0054(6)   |
| O1   | 8c    | 0.5157(4)   | 0.3101(3)   | 0.1437(2)   | 0.0054(9)   |
| O2   | 8c    | 0.5659(5)   | 0.1759(4)   | 0.4937(2)   | 0.0089(10)  |
| O3   | 8c    | 0.5035(5)   | 0.2385(3)   | 0.2617(2)   | 0.0054(6)   |
| O4   | 8c    | 0.3098(4)   | 0.3064(4)   | 0.3294(2)   | 0.0066(9)   |
| O6   | 8c    | 0.6441(4)   | 0.4087(4)   | 0.2370(2)   | 0.0069(9)   |
| O7   | 8c    | 0.5347(4)   | 0.2600(4)   | 0.3789(2)   | 0.0096(7)   |
| O8   | 8c    | 0.3618(5)   | 0.3035(4)   | 0.4733(2)   | 0.0130(10)  |

|     |    |           |            |            |            |
|-----|----|-----------|------------|------------|------------|
| O9  | 8c | 0.1781(5) | 0.0012(4)  | 0.3287(2)  | 0.0096(7)  |
| O10 | 8c | 0.1817(5) | 0.1452(4)  | 0.4126(2)  | 0.0084(9)  |
| O11 | 8c | 0.3425(5) | -0.0170(4) | 0.4259(2)  | 0.0071(9)  |
| O12 | 8c | 0.3875(5) | 0.1203(4)  | 0.3354(3)  | 0.0132(11) |
| O13 | 8c | 0.6090(5) | 0.3756(4)  | 0.4694(2)  | 0.0139(11) |
| O14 | 8c | 0.3626(5) | 0.0481(4)  | 0.5694(2)  | 0.0124(10) |
| B1  | 8c | 0.4299(7) | 0.2340(6)  | 0.3276(4)  | 0.0040(10) |
| B2  | 8c | 0.2908(7) | 0.4024(6)  | 0.2894(4)  | 0.0040(10) |
| H1  | 8c | 0.280(4)  | 0.075(6)   | 0.555(4)   | 0.02(2)    |
| H2  | 8c | 0.393(13) | 0.104(7)   | 0.595(5)   | 0.10(5)    |
| H3  | 8c | 0.637(12) | 0.367(10)  | 0.5121(19) | 0.08(4)    |

Site occupations: Cs1 0.62(2), Cs2 0.22(1), 0.16(2).

Table S3. Atomic coordinates and isotropic/equivalent isotropic displacement parameters (Å<sup>2</sup>) for (IV)

| Atom | Wyck. | x/a         | y/b         | z/c        | U <sub>iso</sub> /U <sub>eq</sub> |
|------|-------|-------------|-------------|------------|-----------------------------------|
| Rb1  | 8c    | 0.36831(19) | 0.07736(14) | 0.14735(9) | 0.0460(4)                         |
| Rb2  | 8c    | 0.2933(10)  | 0.1051(8)   | 0.1626(5)  | 0.0460(4)                         |
| Rb3  | 8c    | 0.3371(12)  | 0.1071(9)   | 0.1243(6)  | 0.0460(4)                         |
| Ni1  | 8c    | 0.68168(9)  | 0.30809(7)  | 0.08130(4) | 0.0062(2)                         |
| Ni2  | 4a    | ½           | 0           | ½          | 0.0091(3)                         |
| Fe2  | 4a    | ½           | 0           | ½          | 0.0091(3)                         |
| P1   | 8c    | 0.50404(19) | 0.33663(14) | 0.21460(8) | 0.0060(4)                         |
| P2   | 8c    | 0.27314(18) | 0.05923(15) | 0.37811(8) | 0.0065(4)                         |
| P3   | 8c    | 0.5067(2)   | 0.27788(15) | 0.45384(8) | 0.0087(4)                         |
| O5   | 8c    | 0.3694(5)   | 0.4040(4)   | 0.2280(2)  | 0.0077(10)                        |
| O1   | 8c    | 0.5061(5)   | 0.3047(4)   | 0.1422(2)  | 0.0082(10)                        |
| O2   | 8c    | 0.5636(5)   | 0.1790(4)   | 0.4924(2)  | 0.0122(11)                        |
| O3   | 8c    | 0.4960(5)   | 0.2349(4)   | 0.2601(2)  | 0.0087(10)                        |
| O4   | 8c    | 0.3006(5)   | 0.3006(4)   | 0.3279(2)  | 0.0071(10)                        |
| O6   | 8c    | 0.6324(5)   | 0.4080(4)   | 0.2343(2)  | 0.0108(8)                         |
| O7   | 8c    | 0.5307(5)   | 0.2651(4)   | 0.3770(2)  | 0.0133(11)                        |
| O8   | 8c    | 0.3575(5)   | 0.3036(4)   | 0.4723(2)  | 0.0134(8)                         |
| O9   | 8c    | 0.1805(5)   | -0.0033(4)  | 0.3276(2)  | 0.0100(10)                        |
| O10  | 8c    | 0.1763(5)   | 0.1403(4)   | 0.4131(2)  | 0.0134(8)                         |
| O11  | 8c    | 0.3436(5)   | -0.0213(4)  | 0.4262(2)  | 0.0091(10)                        |
| O12  | 8c    | 0.3891(5)   | 0.1175(4)   | 0.3379(2)  | 0.0108(8)                         |
| O13  | 8c    | 0.6026(6)   | 0.3806(4)   | 0.4684(2)  | 0.0161(12)                        |
| O14  | 8c    | 0.3578(5)   | 0.0435(5)   | 0.5703(2)  | 0.0163(12)                        |
| B1   | 8c    | 0.4247(8)   | 0.2316(7)   | 0.3274(4)  | 0.0069(12)                        |
| B2   | 8c    | 0.2814(8)   | 0.3985(7)   | 0.2888(4)  | 0.0069(12)                        |
| H1   | 8c    | 0.278(6)    | 0.073(8)    | 0.551(4)   | 0.06(3)                           |
| H2   | 8c    | 0.401(9)    | 0.096(6)    | 0.596(4)   | 0.05(3)                           |
| H3   | 8c    | 0.633(9)    | 0.386(7)    | 0.5121(15) | 0.04(3)                           |

Site occupations: Rb1 0.744(7), Cs2 0.127(4), 0.129(7), Ni2 0.50(3), Fe2 0.50(3).

Table S4. Local bond-valence balance in the crystal structures of  $A_2M_3(H_2O)_2[B_4P_6O_{24}(OH)_2]$ , where  $A=Cs, Rb$ ;  $M=Ni, Cu, (Ni,Fe)$ .

| <b>Cs<sub>2</sub>Cu<sub>3</sub>(H<sub>2</sub>O)<sub>2</sub>[B<sub>4</sub>P<sub>6</sub>O<sub>24</sub>(OH)<sub>2</sub>]</b>                   |             |                                                     |             |             |             |             |             |             |             |             |             |             |
|---------------------------------------------------------------------------------------------------------------------------------------------|-------------|-----------------------------------------------------|-------------|-------------|-------------|-------------|-------------|-------------|-------------|-------------|-------------|-------------|
|                                                                                                                                             | Cu1         | Cu2                                                 | Cs1*        | P1          | P2          | P3          | B1          | B2          | H1          | H2          | H3          | Σ           |
| O1                                                                                                                                          | 0.429       |                                                     | 0.101       | 1.368       |             |             |             |             |             | 0.24        |             | <b>2.14</b> |
| O2                                                                                                                                          | 0.462       | 0.099↓ <sub>2</sub> *                               |             |             |             | 1.361       |             |             |             |             |             | <b>1.92</b> |
| O3                                                                                                                                          |             |                                                     | 0.121       | 1.235       |             |             | 0.729       |             |             |             |             | <b>2.09</b> |
| O4                                                                                                                                          | 0.387       |                                                     |             |             |             |             | 0.803       | 0.803       |             |             |             | <b>1.99</b> |
| O5                                                                                                                                          |             |                                                     | 0.058       | 1.245       |             |             |             | 0.774       |             |             |             | <b>2.08</b> |
| O6                                                                                                                                          |             |                                                     | 0.103       | 1.255       |             |             |             | 0.737       |             |             |             | <b>2.10</b> |
| O7                                                                                                                                          |             |                                                     |             |             |             | 1.202       | 0.776       |             |             |             |             | <b>1.98</b> |
| O8                                                                                                                                          | 0.541       |                                                     | 0.026       |             |             | 1.361       |             |             |             |             |             | <b>1.93</b> |
| O9                                                                                                                                          |             |                                                     | 0.065       |             | 1.205       |             |             | 0.794       |             |             |             | <b>2.06</b> |
| O10                                                                                                                                         | 0.205       |                                                     | 0.112       |             | 1.368       |             |             |             |             |             | 0.42        | <b>2.11</b> |
| O11                                                                                                                                         | 0.102       | 0.465↓ <sub>2</sub>                                 |             |             | 1.350       |             |             |             |             |             |             | <b>1.92</b> |
| O12                                                                                                                                         |             |                                                     | 0.045       |             | 1.221       |             | 0.795       |             |             |             |             | <b>2.06</b> |
| O13                                                                                                                                         |             |                                                     | 0.059       |             |             | 1.157       |             |             | 0.20        |             | 0.58        | <b>2.00</b> |
| O14                                                                                                                                         |             | 0.489↓ <sub>2</sub>                                 | 0.155       |             |             |             |             |             | 0.80        | 0.76        |             | <b>2.20</b> |
| Σ                                                                                                                                           | <b>2.13</b> | <b>2.11</b>                                         | <b>0.85</b> | <b>5.10</b> | <b>5.14</b> | <b>5.08</b> | <b>3.10</b> | <b>3.11</b> | <b>1.00</b> | <b>1.00</b> | <b>1.00</b> |             |
| <b>Cs<sub>2</sub>Ni<sub>3</sub>(H<sub>2</sub>O)<sub>2</sub>[B<sub>4</sub>P<sub>6</sub>O<sub>24</sub>(OH)<sub>2</sub>]</b>                   |             |                                                     |             |             |             |             |             |             |             |             |             |             |
|                                                                                                                                             | Ni1         | Ni2                                                 | Cs1*        | P1          | P2          | P3          | B1          | B2          | H1          | H2          | H3          | Σ           |
| O1                                                                                                                                          | 0.336       |                                                     | 0.146       | 1.350       |             |             |             |             |             | 0.22        |             | <b>2.05</b> |
| O2                                                                                                                                          | 0.292       | 0.200                                               |             |             |             | 1.251       |             |             |             |             |             | <b>1.74</b> |
| O3                                                                                                                                          |             |                                                     | 0.098       | 1.228       |             |             | 0.723       |             |             |             |             | <b>2.05</b> |
| O4                                                                                                                                          | 0.282       |                                                     |             |             |             |             | 0.808       | 0.846       |             |             |             | <b>1.94</b> |
| O5                                                                                                                                          |             |                                                     | 0.117       | 1.235       |             |             |             | 0.715       |             |             |             | <b>1.94</b> |
| O6                                                                                                                                          |             |                                                     | 0.047       | 1.241       |             |             |             | 0.765       |             |             |             | <b>2.07</b> |
| O7                                                                                                                                          |             |                                                     | 0.032       |             |             | 1.182       | 0.778       |             |             |             |             | <b>1.99</b> |
| O8                                                                                                                                          | 0.408       |                                                     | 0.031       |             |             | 1.368       |             |             |             |             |             | <b>1.81</b> |
| O9                                                                                                                                          |             |                                                     | 0.081       |             | 1.238       |             |             | 0.759       |             |             |             | <b>2.08</b> |
| O10                                                                                                                                         | 0.341       |                                                     | 0.063       |             | 1.350       |             |             |             |             |             | 0.45        | <b>2.20</b> |
| O11                                                                                                                                         | 0.287       | 0.287↓ <sub>2</sub>                                 |             |             | 1.269       |             |             |             |             |             |             | <b>1.84</b> |
| O12                                                                                                                                         |             |                                                     |             |             | 1.251       |             | 0.790       |             |             |             |             | <b>2.04</b> |
| O13                                                                                                                                         |             |                                                     | 0.051       |             |             | 1.135       |             |             | 0.22        |             | 0.55        | <b>1.96</b> |
| O14                                                                                                                                         |             | 0.398↓ <sub>2</sub>                                 | 0.180       |             |             |             |             |             | 0.78        | 0.78        |             | <b>2.14</b> |
| Σ                                                                                                                                           | <b>1.95</b> | <b>1.77</b>                                         | <b>0.85</b> | <b>5.05</b> | <b>5.05</b> | <b>4.94</b> | <b>3.10</b> | <b>3.09</b> | <b>1.00</b> | <b>1.00</b> | <b>1.00</b> |             |
| <b>Rb<sub>2</sub>Ni<sub>2.5</sub>Fe<sub>0.5</sub>(H<sub>2</sub>O)<sub>2</sub>[B<sub>4</sub>P<sub>6</sub>O<sub>24</sub>(OH)<sub>2</sub>]</b> |             |                                                     |             |             |             |             |             |             |             |             |             |             |
|                                                                                                                                             | Ni1         | (Ni <sub>0.5</sub> Fe <sub>0.5</sub> ) <sub>2</sub> | Rb1*        | P1          | P2          | P3          | B1          | B2          | H1          | H2          | H3          | Σ           |
| O1                                                                                                                                          | 0.337       |                                                     | 0.114       | 1.402       |             |             |             |             |             | 0.20        |             | <b>2.05</b> |
| O2                                                                                                                                          | 0.300       | 0.210↓ <sub>2</sub>                                 |             |             |             | 1.275       |             |             |             |             |             | <b>1.79</b> |
| O3                                                                                                                                          |             |                                                     | 0.081       | 1.231       |             |             | 0.702       |             |             |             |             | <b>2.01</b> |
| O4                                                                                                                                          | 0.276       |                                                     |             |             |             |             | 0.817       | 0.839       |             |             |             | <b>1.93</b> |
| O5                                                                                                                                          |             |                                                     | 0.037       | 1.235       |             |             |             | 0.761       |             |             |             | <b>2.03</b> |
| O6                                                                                                                                          |             |                                                     | 0.095       | 1.218       |             |             |             | 0.731       |             |             |             | <b>2.04</b> |
| O7                                                                                                                                          |             |                                                     |             |             |             | 1.186       | 0.771       |             |             |             |             | <b>1.96</b> |
| O8                                                                                                                                          | 0.396       |                                                     |             |             |             | 1.402       |             |             |             |             |             | <b>1.80</b> |
| O9                                                                                                                                          |             |                                                     | 0.090       |             | 1.241       |             |             | 0.761       |             |             |             | <b>2.09</b> |
| O10                                                                                                                                         | 0.341       |                                                     | 0.071       |             | 1.310       |             |             |             |             |             | 0.45        | <b>2.17</b> |
| O11                                                                                                                                         | 0.230       | 0.332↓ <sub>2</sub>                                 |             |             | 1.279       |             |             |             |             |             |             | <b>1.84</b> |
| O12                                                                                                                                         |             |                                                     |             |             | 1.258       |             | 0.817       |             |             |             |             | <b>2.08</b> |
| O13                                                                                                                                         |             |                                                     | 0.054       |             |             | 1.120       |             |             | 0.23        |             | 0.55        | <b>1.95</b> |
| O14                                                                                                                                         |             | 0.425↓ <sub>2</sub>                                 | 0.13        |             |             |             |             |             | 0.77        | 0.80        |             | <b>2.15</b> |
| Σ                                                                                                                                           | <b>1.88</b> | <b>1.93</b>                                         | <b>0.67</b> | <b>5.09</b> | <b>5.09</b> | <b>4.98</b> | <b>3.11</b> | <b>3.09</b> | <b>1.00</b> | <b>1.00</b> | <b>1.00</b> |             |

\*The ↓<sub>2</sub> sign indicate the doubling of the corresponding contributions due to the symmetry. \*\*Taking into account the site with maximum population only, A1.

Table S5. Chemical composition of sample (III) determined by EDS analysis

| Element/At.% |         |         |         | average |
|--------------|---------|---------|---------|---------|
| Rb           | 4,3(1)  | 4,2(1)  | 4,2(1)  | 4.2(1)  |
| Ni           | 5,7(1)  | 5,7(1)  | 5,6(1)  | 5.7(1)  |
| Fe           | 1.1(1)  | 1.2(1)  | 1.1(1)  | 1.1(1)  |
| P            | 14,2(1) | 14,4(1) | 14,3(1) | 14.3(1) |
| O            | 62,5(2) | 63,5(2) | 63,5(2) | 63.2(2) |
